# Supplementary material
Source: publisher figshare collection journal article supplement (https://tandf.figshare.com/ndownloader/files/21518814)
Supplement: Supplementary file 1 [file 21518814]

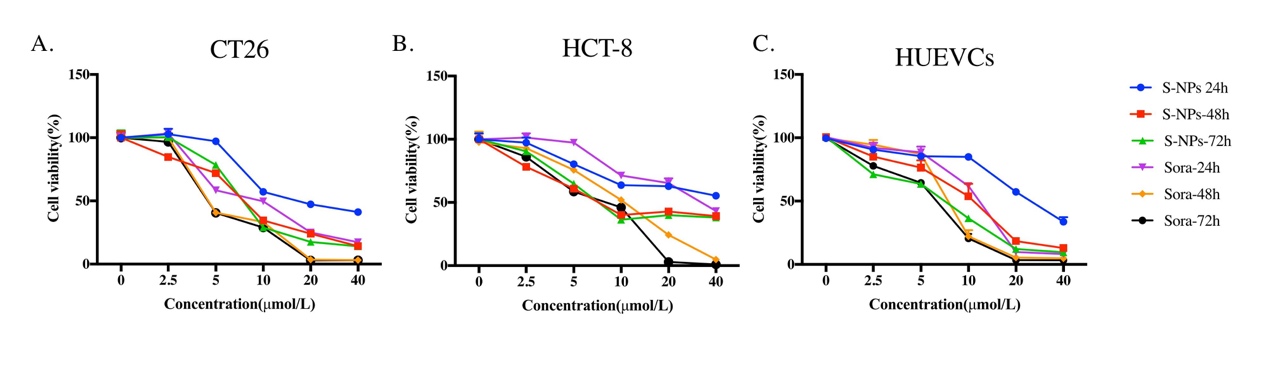


**Supplementary Figure 1.** Viability of CT26 and HCT-8 cells and HUVECs after treatment with free sorafenib or sorafenib-loaded nanoparticles (S-NPs) for 24, 48, or 72 h. Data are mean ± SD of three independent experiments (each conducted in triplicate).
